## Running stability is enhanced by a proximo-distal gradient in joint neuromechanical control

M. A. Daley, G. Felix and A. A. Biewener

10.1242/jeb.004226

There was an error published in Fig. 9 of *J. Exp. Biol.* **210**, 383-394.

The correct Fig. 9 is printed below.

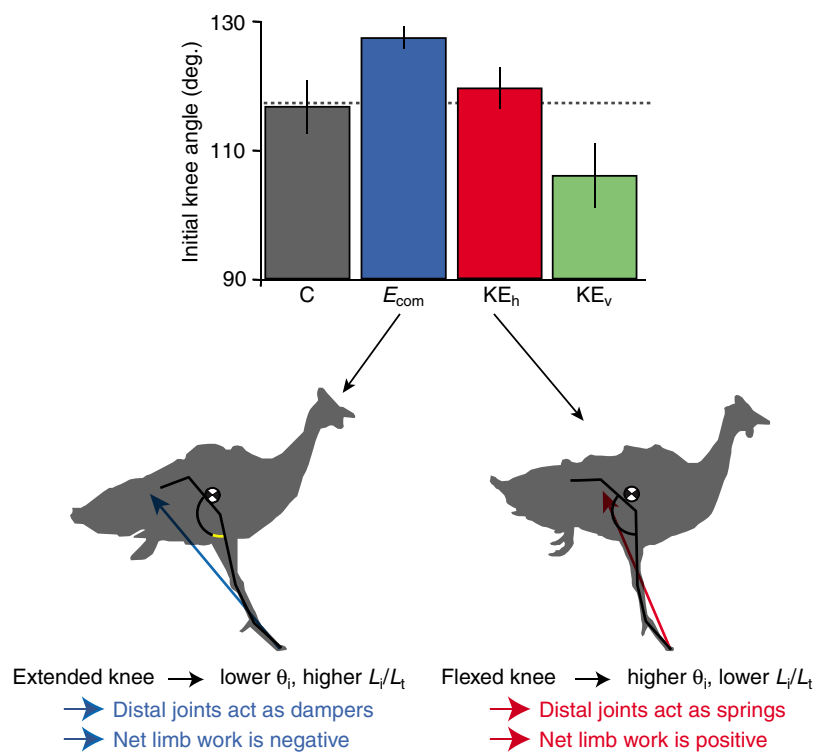

We apologise to authors and readers for any inconvenience that this error may have caused.
